# Supplementary material
Source: PubMed Central journal article supplement (PMC4288886)
Supplement: IAI.02494-14_zii999091035so1.pdf [file IAI.02494-14_zii999091035so1.pdf]

## SUPPLEMENTARY TEXT, TABLE AND FIGURES

Manuscript entitled “**Macrophage polarization drives granuloma outcome during *Mycobacterium tuberculosis* infection**”.

## SUPPLEMENTARY TEXT, TABLE AND FIGURES

Manuscript entitled “**Macrophage polarization drives granuloma outcome during *Mycobacterium tuberculosis* infection**”.

### Macrophage Polarization Ratio - $R_{MP}$ Calculation

Macrophage stimulation is represented by 3 integer counters: pro-inflammatory STAT1counter, NFkBcounter, and anti-inflammatory STAT3counter. These are initialized to 1 and are incremented by 1 when stimulation events occur (see Figure 1A), up to a specified maximum value (STAT1MaxLevel, STAT3MaxLevel, NFkBMaxLevel). These counters are used to calculate the downstream metabolic events of variables stat3Genes, stat1Genes and nfkbGenes.

When stimulation occurs and the counter is increased, a linear decay function maps the change in counter into the signal dynamics shown in Figure 1E using the parameters  $\beta$  ("gene production") and  $\delta$  ("gene degradation"). The gene levels (with a minimum set to 1) are calculated every 10 minutes of simulation based on the following equation (e.g, for STAT1):

$$\text{tempSTAT1} = \text{stat1Genes} + (\text{STAT1counter} * \beta_{\text{STAT1}}) - \text{stat1Genes} * \delta_{\text{STAT1}};$$

$$\text{stat1Genes} = \max(\text{tempSTAT1}, 1);$$

The Macrophage Polarization Ratio [ $R_{MP}$ ] for each macrophage is then calculated as:

$$R_{MP} = (\text{stat1Genes} + \text{NFkBGenes})/2 * (\text{stat3Genes})$$

For STAT1 (and similarly for the other two pathways) the max gene levels are calculated as:

$$\text{maxSTAT1Gene} = \log_{10}(\text{stat1MaxLevel} * (\beta_{\text{STAT1}} / \delta_{\text{STAT1}})).$$

The maxGeneLevel is used to define the range [min,max] for  $R_{MP}$ . Log10 is used to prevent bias in signaling due to the range of  $\beta$  ("gene production") and  $\delta$  ("gene degradation") parameters over orders of magnitude. The maximum value for  $R_{MP}$  is calculated as:

$$\text{max}R_{MP} = \log_{10}((\text{maxSTAT1Gene} + \text{maxNFkBGene})/2 * 1).$$

The minimum value for the ratio is calculated as:

$$\text{min}R_{MP} = \log_{10}(1/\text{maxSTAT3Gene}).$$

$R_{MP}$  is normalized between 0 and 1 by defining a linear interpolation of  $R_{MP}$  using:

i) **slope** =  $1/(\text{max}R_{MP} - \text{min}R_{MP})$

ii) **intercept** =  $-1 * (\text{min}R_{MP} / (\text{max}R_{MP} - \text{min}R_{MP}))$

and adjusting  $R_{MP}$  as:

$$\text{Normalized\_}R_{MP} = \text{slope} * \log_{10}(R_{MP}) + \text{intercept}$$

The Normalized\_  $R_{MP}$  is used to scale parameters related to immune functions (lifespan, killing and secretion parameters) for each individual macrophage.

## **TNF and IL-10 secretion**

TNF is secreted by all macrophage phenotypes (except M0) and by T cells. The rates of secretion are defined by the parameters  $k_{synthMac}$  and  $kRNAMac$  (for macrophages) and  $k_{synthTcell}$  and  $kRNATcell$  (for T cells). These parameters are modulated by the macrophage polarization ratio (see the details in the Supplementary Text “*Macrophage Polarization Ratio -  $R_{MP}$  Calculation*”).

IL-10 is secreted by all macrophage phenotypes (except M0) and by regulatory T cells. The rates of secretion are defined by the parameters  $IkSynthMacInf$  and  $IkSynthMacAct$  (for macrophages) and  $dIL10$  (for T cells). Similarly to TNF, these parameters are modulated by the macrophage polarization ratio (see the details in the Supplementary Text “*Macrophage Polarization Ratio -  $R_{MP}$  Calculation*”).

As far as describing how IL-10 and TNF regulate macrophages, the reader is referred to Figure 1 of (2), where a schematic diagram illustrates all TNF and IL-10 mechanisms included in the ABM.

**Tables S1:** sensitivity analysis results obtained from calculating PRCCs on many different outputs measured on the in silico granulomas shown in Figure 3. Many time points post infection were considered (i.e., day 10, 20, 30, 40, 50, 100, 150 and 200). Each parameter listed in the tables has a PRCC significantly (i.e.,  $p < 1e-3$ ) different from zero. The outputs are CFU/Granuloma,, Granuloma Polarization Ratio, total count of macrophages, unpolarized M0, infected, M1, M2, M1M2 macrophages, total TNF molecules, total IL10 molecules, lesion size, Caseation/necrosis and macrophage apoptosis. Details on the parameters can be found in Table 1.

### CFU/granuloma PARAMETERS

| Days | PARAMETERS                                                                               |                                          |                                |                                         |                               |                          |                               |                                    |
|------|------------------------------------------------------------------------------------------|------------------------------------------|--------------------------------|-----------------------------------------|-------------------------------|--------------------------|-------------------------------|------------------------------------|
| 10   | prob <sub>KillExtMtb-M0</sub><br>-0.0861                                                 |                                          |                                |                                         |                               |                          |                               |                                    |
| 20   | prob <sub>KillExtMtb-M0</sub><br>-0.1201                                                 |                                          |                                |                                         |                               |                          |                               |                                    |
| 30   | prob <sub>KillExtMtb-M0</sub> time <sub>Rec</sub><br>-0.1441                      0.3914 |                                          |                                |                                         |                               |                          |                               |                                    |
| 40   | $\delta_{NFkB}$<br>-0.2779                                                               | prob <sub>KillExtMtb-M0</sub><br>-0.1001 | $k_{NFkB}$<br>0.1674           | time <sub>Rec</sub><br>0.5753           |                               |                          |                               |                                    |
| 50   | $\delta_{NFkB}$<br>-0.3671                                                               | $\tau_{NFkB-TNF}$<br>-0.1171             | $\delta_{NFkB}$<br>-0.1058     | Synth <sub>IL10-MI</sub><br>-0.0901     | $\beta_{NFkB}$<br>0.1167      | $k_{NFkB}$<br>0.2346     | time <sub>Rec</sub><br>0.5860 |                                    |
| 100  | $\delta_{NFkB}$<br>-0.3604                                                               | prob <sub>KillIntMtb</sub><br>-0.1603    | $\tau_{NFkB-TNF}$<br>-0.1247   | prob <sub>KillExtMtb-M0</sub><br>0.0959 | $\beta_{NFkB}$<br>0.1972      | $k_{NFkB}$<br>0.2540     | time <sub>Rec</sub><br>0.2670 | prob <sub>STAT1-Ty</sub><br>0.5365 |
| 150  | $\delta_{NFkB}$<br>-0.2209                                                               | prob <sub>KillIntMtb</sub><br>-0.1578    | $\tau_{STAT3-IL10}$<br>-0.1054 | $\tau_{NFkB-TNF}$<br>-0.0904            | time <sub>Rec</sub><br>0.1449 | $\beta_{NFkB}$<br>0.1695 | $k_{NFkB}$<br>0.1770          | prob <sub>STAT1-Ty</sub><br>0.5214 |
| 200  | $\delta_{NFkB}$<br>-0.1641                                                               | prob <sub>KillIntMtb</sub><br>-0.1439    | $\tau_{STAT3-IL10}$<br>-0.1284 | time <sub>Rec</sub><br>0.0977           | IkSynthMA<br>0.1032           | $\beta_{NFkB}$<br>0.1383 | $k_{NFkB}$<br>0.1398          | prob <sub>STAT1-Ty</sub><br>0.4834 |

### Granuloma Polarization Ratio PARAMETERS

| Days | PARAMETERS                 |                                     |                                     |                             |                                         |                               |                               |                               |                          |  |
|------|----------------------------|-------------------------------------|-------------------------------------|-----------------------------|-----------------------------------------|-------------------------------|-------------------------------|-------------------------------|--------------------------|--|
| 10   | $\delta_{NFkB}$<br>-0.7330 | $\tau_{NFkB-TNF}$<br>-0.0950        | $k_{NFkB}$<br>0.2606                | $\beta_{NFkB}$<br>0.7653    |                                         |                               |                               |                               |                          |  |
| 20   | $\delta_{NFkB}$<br>-0.7038 | Synth <sub>IL10-MI</sub><br>-0.4258 | Synth <sub>IL10-MA</sub><br>-0.1714 | $\tau_{NFkB-TNF}$<br>0.0865 | prob <sub>KillExtMtb-M0</sub><br>0.1111 | $\tau_{STAT3-IL10}$<br>0.2547 | $\beta_{NFkB}$<br>0.6543      |                               |                          |  |
| 30   | $\delta_{NFkB}$<br>-0.6186 | Synth <sub>IL10-MI</sub><br>-0.5011 | Synth <sub>IL10-MA</sub><br>-0.2377 | $k_{STAT3-IL10}$<br>-0.1020 | $\delta_{STAT1}$<br>-0.0946             | $\beta_{STAT1}$<br>0.2209     | time <sub>Rec</sub><br>0.2432 | $\tau_{STAT3-IL10}$<br>0.2881 | $\beta_{NFkB}$<br>0.5674 |  |
| 40   | Synth <sub>IL10-MI</sub>   | $\delta_{NFkB}$                     | Synth <sub>IL10-MA</sub>            | time <sub>Rec</sub>         | prob <sub>STAT1-Ty</sub>                | prob <sub>KillExtMtb-M0</sub> | $\tau_{STAT3-IL10}$           | $\beta_{STAT1}$               | $\beta_{NFkB}$           |  |

|            |                 |                          |                          |                          |                          |                           |                          |                     |                 |                |
|------------|-----------------|--------------------------|--------------------------|--------------------------|--------------------------|---------------------------|--------------------------|---------------------|-----------------|----------------|
| <b>50</b>  | -0.4246         | -0.3837                  | -0.2612                  | -0.1393                  | -0.1202                  | 0.0922                    | 0.2360                   | 0.2562              | 0.7238          |                |
|            | $\delta_{NFkB}$ | Synth <sub>IL10-MI</sub> | Synth <sub>IL10-MA</sub> | prob <sub>STAT1-Ty</sub> | $\delta_{STAT1}$         | $k_{NFkB}$                | $\tau_{STAT3-IL10}$      | $\beta_{STAT1}$     | $\beta_{NFkB}$  |                |
|            | -0.4458         | -0.3658                  | -0.2565                  | -0.1554                  | -0.1201                  | -0.1036                   | 0.2184                   | 0.2329              | 0.7142          |                |
| <b>100</b> | $\delta_{NFkB}$ | prob <sub>STAT1-Ty</sub> | Synth <sub>IL10-MI</sub> | $\delta_{STAT1}$         | Synth <sub>IL10-MA</sub> | Act_Time <sub>STAT3</sub> | $\tau_{STAT3-IL10}$      | time <sub>Rec</sub> | $\beta_{STAT1}$ | $\beta_{NFkB}$ |
|            | -0.5887         | -0.2859                  | -0.2349                  | -0.2031                  | -0.1253                  | 0.1016                    | 0.1061                   | 0.1684              | 0.3287          | 0.4804         |
| <b>150</b> | $\delta_{NFkB}$ | Synth <sub>IL10-MI</sub> | $\delta_{STAT1}$         | Synth <sub>IL10-MA</sub> | $k_{STAT3-IL10}$         | prob <sub>STAT1-Ty</sub>  | $\tau_{STAT3-IL10}$      | $\beta_{STAT1}$     | $\beta_{NFkB}$  |                |
|            | -0.4806         | -0.2339                  | -0.2116                  | -0.1563                  | -0.1030                  | 0.1156                    | 0.1357                   | 0.2960              | 0.4492          |                |
| <b>200</b> | $\delta_{NFkB}$ | $\delta_{STAT1}$         | Synth <sub>IL10-MI</sub> | Synth <sub>IL10-MA</sub> | $\tau_{STAT3-IL10}$      | Act_Time <sub>STAT1</sub> | prob <sub>STAT1-Ty</sub> | $\beta_{STAT1}$     | $\beta_{NFkB}$  |                |
|            | -0.4231         | -0.2154                  | -0.1682                  | -0.0990                  | 0.0915                   | 0.0965                    | 0.2048                   | 0.3112              | 0.4302          |                |

### Total Macrophages PARAMETERS

|             |                  |                          |                          |                               |                          |                            |                          |                               |            |                          |
|-------------|------------------|--------------------------|--------------------------|-------------------------------|--------------------------|----------------------------|--------------------------|-------------------------------|------------|--------------------------|
| <b>Days</b> |                  |                          |                          |                               |                          |                            |                          |                               |            |                          |
| <b>10</b>   | $\delta_{NFkB}$  | $k_{NFkB}$               |                          |                               |                          |                            |                          |                               |            |                          |
|             | -0.1050          | 0.1387                   |                          |                               |                          |                            |                          |                               |            |                          |
| <b>20</b>   | $\delta_{NFkB}$  | Synth <sub>IL10-MI</sub> | $\tau_{NFkB-TNF}$        | Synth <sub>IL10-MA</sub>      | $\tau_{STAT3-IL10}$      | $\beta_{NFkB}$             | $k_{NFkB}$               |                               |            |                          |
|             | -0.6476          | -0.2519                  | -0.1832                  | -0.0979                       | 0.1198                   | 0.1918                     | 0.3078                   |                               |            |                          |
| <b>30</b>   | $\delta_{NFkB}$  | Synth <sub>IL10-MI</sub> | $\tau_{NFkB-TNF}$        | stat3GeneDeg                  | $\tau_{STAT3-IL10}$      | $\beta_{NFkB}$             | $k_{NFkB}$               | prob <sub>STAT1-Ty</sub>      |            |                          |
|             | -0.6977          | -0.2883                  | -0.1638                  | -0.1060                       | 0.1226                   | 0.2006                     | 0.3459                   | 0.4872                        |            |                          |
| <b>40</b>   | $\delta_{NFkB}$  | Synth <sub>IL10-MI</sub> | $\tau_{NFkB-TNF}$        | prob <sub>KillExtMtb-M0</sub> | $\beta_{NFkB}$           | $k_{NFkB}$                 | prob <sub>STAT1-Ty</sub> |                               |            |                          |
|             | -0.5982          | -0.1923                  | -0.1715                  | 0.1190                        | 0.1431                   | 0.3006                     | 0.8334                   |                               |            |                          |
| <b>50</b>   | $\delta_{NFkB}$  | $\tau_{NFkB-TNF}$        | Synth <sub>IL10-MI</sub> | timeRec                       | Act_t <sub>STAT1</sub>   | $\tau_{AgeTrans}$          | $\beta_{NFkB}$           | prob <sub>KillExtMtb-M0</sub> | $k_{NFkB}$ | prob <sub>STAT1-Ty</sub> |
|             | -0.4799          | -0.1530                  | -0.1501                  | -0.1345                       | 0.0899                   | 0.1053                     | 0.1333                   | 0.1853                        | 0.2415     | 0.9031                   |
| <b>100</b>  | $\delta_{STAT1}$ | timeRec                  | Synth <sub>IL10-MI</sub> | Synth <sub>IL10-MA</sub>      | $\tau_{AgeTrans}$        | $\delta_{STAT3}$           | prob <sub>STAT1-Ty</sub> |                               |            |                          |
|             | -0.1416          | -0.1320                  | -0.1302                  | -0.1051                       | 0.0952                   | 0.1047                     | 0.9431                   |                               |            |                          |
| <b>150</b>  | $\delta_{STAT1}$ | Synth <sub>IL10-MA</sub> | $\tau_{NFkB-TNF}$        | prob <sub>KillIntMtb</sub>    | prob <sub>STAT1-Ty</sub> |                            |                          |                               |            |                          |
|             | -0.2276          | -0.1385                  | 0.0859                   | 0.1142                        | 0.9219                   |                            |                          |                               |            |                          |
| <b>200</b>  | $\delta_{STAT1}$ | Synth <sub>IL10-MA</sub> | Synth <sub>IL10-MI</sub> | $\tau_{STAT3-IL10}$           | $\tau_{NFkB-TNF}$        | prob <sub>KillIntMtb</sub> | prob <sub>STAT1-Ty</sub> |                               |            |                          |
|             | -0.2347          | -0.1535                  | -0.1426                  | 0.0855                        | 0.0928                   | 0.1046                     | 0.8845                   |                               |            |                          |

### Total Infected Macrophages PARAMETERS

|             |                               |                          |                   |                               |                     |            |                          |         |  |  |
|-------------|-------------------------------|--------------------------|-------------------|-------------------------------|---------------------|------------|--------------------------|---------|--|--|
| <b>Days</b> |                               |                          |                   |                               |                     |            |                          |         |  |  |
| <b>10</b>   | prob <sub>KillExtMtb-M0</sub> |                          |                   |                               |                     |            |                          |         |  |  |
|             | -0.0973                       |                          |                   |                               |                     |            |                          |         |  |  |
| <b>20</b>   | Synth <sub>IL10-MI</sub>      | Synth <sub>IL10-MA</sub> | $k_{NFkB}$        | $\tau_{STAT3-IL10}$           | $\delta_{NFkB}$     |            |                          |         |  |  |
|             | -0.2420                       | -0.1688                  | -0.1203           | 0.1620                        | 0.2725              |            |                          |         |  |  |
| <b>30</b>   | Synth <sub>IL10-MI</sub>      | Synth <sub>IL10-MA</sub> | $\delta_{NFkB}$   | prob <sub>KillExtMtb-M0</sub> | $\tau_{STAT3-IL10}$ | timeRec    |                          |         |  |  |
|             | -0.2760                       | -0.1710                  | -0.1545           | -0.1094                       | 0.1638              | 0.2038     |                          |         |  |  |
| <b>40</b>   | $\delta_{NFkB}$               | Synth <sub>IL10-MI</sub> | $\tau_{NFkB-TNF}$ | $\tau_{STAT3-IL10}$           | $\beta_{NFkB}$      | $k_{NFkB}$ | prob <sub>STAT1-Ty</sub> | timeRec |  |  |

|            |                                       |                                                |                                         |                                    |                             |                                |                                              |        |
|------------|---------------------------------------|------------------------------------------------|-----------------------------------------|------------------------------------|-----------------------------|--------------------------------|----------------------------------------------|--------|
| <b>50</b>  | -0.5393<br>$\delta_{NFkB}$<br>-0.4900 | -0.2214<br>Synth <sub>IL10-MI</sub><br>-0.1593 | -0.1316<br>$\tau_{NFkB-TNF}$<br>-0.1457 | 0.0872<br>$\beta_{NFkB}$<br>0.1744 | 0.1524<br>timeRec<br>0.2033 | 0.2917<br>$k_{NFkB}$<br>0.2861 | 0.3555<br>prob <sub>STAT1-Ty</sub><br>0.6081 | 0.3705 |
| <b>100</b> | $\delta_{NFkB}$<br>-0.1050            | $\tau_{STAT3-IL10}$<br>-0.0941                 | $\beta_{NFkB}$<br>0.1366                | prob <sub>STAT1-Ty</sub><br>0.6733 |                             |                                |                                              |        |
| <b>150</b> | $\beta_{NFkB}$<br>0.0882              | prob <sub>STAT1-Ty</sub><br>0.5701             |                                         |                                    |                             |                                |                                              |        |
| <b>200</b> | Synth <sub>IL10-MA</sub><br>0.0948    | prob <sub>STAT1-Ty</sub><br>0.5553             |                                         |                                    |                             |                                |                                              |        |

### Total M0 PARAMETERS

|            |                                     |                                     |                                     |                                     |                                         |                                    |                                  |                             |                                    |                               |                                         |                                    |                                    |
|------------|-------------------------------------|-------------------------------------|-------------------------------------|-------------------------------------|-----------------------------------------|------------------------------------|----------------------------------|-----------------------------|------------------------------------|-------------------------------|-----------------------------------------|------------------------------------|------------------------------------|
| <b>10</b>  | $\delta_{NFkB}$<br>-0.0871          | $k_{NFkB}$<br>0.1286                |                                     |                                     |                                         |                                    |                                  |                             |                                    |                               |                                         |                                    |                                    |
| <b>20</b>  | $\delta_{NFkB}$<br>-0.5600          | Synth <sub>IL10-MI</sub><br>-0.3076 | Synth <sub>IL10-MA</sub><br>-0.1779 | $\tau_{NFkB-TNF}$<br>-0.1327        | $\beta_{NFkB}$<br>0.1673                | $\tau_{STAT3-IL10}$<br>0.1915      | $k_{NFkB}$<br>0.1953             |                             |                                    |                               |                                         |                                    |                                    |
| <b>30</b>  | $\delta_{NFkB}$<br>-0.6391          | Synth <sub>IL10-MI</sub><br>-0.3889 | Synth <sub>IL10-MA</sub><br>-0.1955 | timeRec<br>-0.1185                  | $\tau_{NFkB-TNF}$<br>-0.1144            | $\delta_{STAT3}$<br>-0.1027        | $k_{STAT3-IL10}$<br>-0.0903      | $\delta_{STAT1}$<br>0.1100  | $\beta_{NFkB}$<br>0.1949           | $\tau_{STAT3-IL10}$<br>0.2125 | $k_{NFkB}$<br>0.2807                    | prob <sub>STAT1-Ty</sub><br>0.4087 |                                    |
| <b>40</b>  | $\delta_{NFkB}$<br>-0.5763          | Synth <sub>IL10-MI</sub><br>-0.3077 | $\tau_{NFkB-TNF}$<br>-0.1485        | Synth <sub>IL10-MA</sub><br>-0.1175 | prob <sub>KillExtMtb-M0</sub><br>0.1171 | $\tau_{STAT3-IL10}$<br>0.1325      | $\beta_{NFkB}$<br>0.1531         | $k_{NFkB}$<br>0.2752        | prob <sub>STAT1-Ty</sub><br>0.8330 |                               |                                         |                                    |                                    |
| <b>50</b>  | $\delta_{NFkB}$<br>-0.4529          | Synth <sub>IL10-MI</sub><br>-0.2740 | timeRec<br>-0.1357                  | Synth <sub>IL10-MA</sub><br>-0.1292 | $\tau_{NFkB-TNF}$<br>-0.1281            | $k_{STAT3-IL10}$<br>-0.0887        | Act <sub>I</sub> STAT1<br>0.0873 | $\tau_{AgeTrans}$<br>0.0922 | $\tau_{STAT3-IL10}$<br>0.1155      | $\beta_{NFkB}$<br>0.1462      | prob <sub>KillExtMtb-M0</sub><br>0.1695 | $k_{NFkB}$<br>0.2228               | prob <sub>STAT1-Ty</sub><br>0.9003 |
| <b>100</b> | Synth <sub>IL10-MI</sub><br>-0.3026 | Synth <sub>IL10-MA</sub><br>-0.2768 | timeRec<br>-0.1233                  | $\tau_{STAT3-IL10}$<br>0.1925       | prob <sub>STAT1-Ty</sub><br>0.8568      |                                    |                                  |                             |                                    |                               |                                         |                                    |                                    |
| <b>150</b> | Synth <sub>IL10-MI</sub><br>-0.2891 | Synth <sub>IL10-MA</sub><br>-0.2624 | $\delta_{STAT1}$<br>-0.0930         | $\tau_{STAT3-IL10}$<br>0.1926       | prob <sub>STAT1-Ty</sub><br>0.7781      |                                    |                                  |                             |                                    |                               |                                         |                                    |                                    |
| <b>200</b> | Synth <sub>IL10-MI</sub><br>-0.2607 | Synth <sub>IL10-MA</sub><br>-0.2435 | $\delta_{STAT1}$<br>-0.0989         | $k_{NFkB}$<br>-0.0973               | $\tau_{STAT3-IL10}$<br>0.1551           | prob <sub>STAT1-Ty</sub><br>0.7381 |                                  |                             |                                    |                               |                                         |                                    |                                    |

### Total M1 PARAMETERS

|           |                            |                                     |                                     |                                     |                              |                                |                                         |                               |                               |                                    |                                    |                   |  |
|-----------|----------------------------|-------------------------------------|-------------------------------------|-------------------------------------|------------------------------|--------------------------------|-----------------------------------------|-------------------------------|-------------------------------|------------------------------------|------------------------------------|-------------------|--|
| <b>10</b> | $\delta_{NFkB}$<br>-0.3702 | $\tau_{NFkB-TNF}$<br>-0.1537        | $k_{NFkB}$<br>0.2676                |                                     |                              |                                |                                         |                               |                               |                                    |                                    |                   |  |
| <b>20</b> | $\delta_{NFkB}$<br>-0.6823 | Synth <sub>IL10-MI</sub><br>-0.4716 | $\tau_{NFkB-TNF}$<br>-0.2045        | Synth <sub>IL10-MA</sub><br>-0.1748 | $\delta_{STAT1}$<br>0.1164   | $\tau_{STAT3-IL10}$<br>0.2199  | $\beta_{NFkB}$<br>0.2308                | $k_{NFkB}$<br>0.4671          |                               |                                    |                                    |                   |  |
| <b>30</b> | $\delta_{NFkB}$<br>-0.5489 | Synth <sub>IL10-MI</sub><br>-0.4790 | Synth <sub>IL10-MA</sub><br>-0.2127 | $\delta_{STAT3}$<br>-0.0923         | $\tau_{NFkB-TNF}$<br>-0.0908 | $\tau_{STAT3-IL10}$<br>-0.0885 | $\delta_{STAT1}$<br>0.1103              | $\beta_{NFkB}$<br>0.1272      | $\tau_{STAT3-IL10}$<br>0.2514 | $k_{NFkB}$<br>0.3284               | prob <sub>STAT1-Ty</sub><br>0.4280 | timeRec<br>0.4319 |  |
| <b>40</b> | $\delta_{NFkB}$<br>-0.4147 | Synth <sub>IL10-MI</sub><br>-0.3481 | Synth <sub>IL10-MA</sub><br>-0.1808 | $\tau_{NFkB-TNF}$<br>-0.1170        | $\delta_{STAT1}$<br>0.0877   | $\beta_{NFkB}$<br>0.1074       | prob <sub>KillExtMtb-M0</sub><br>0.1696 | $\tau_{STAT3-IL10}$<br>0.1712 | $k_{NFkB}$<br>0.2394          | prob <sub>STAT1-Ty</sub><br>0.7597 |                                    |                   |  |

|            |                                     |                                     |                                     |                             |                                         |                               |                                    |
|------------|-------------------------------------|-------------------------------------|-------------------------------------|-----------------------------|-----------------------------------------|-------------------------------|------------------------------------|
| <b>50</b>  | Synth <sub>IL10-MI</sub><br>-0.3512 | $\delta_{Nf\kappa B}$<br>-0.3119    | Synth <sub>IL10-MA</sub><br>-0.1862 | $k_{Nf\kappa B}$<br>0.1657  | prob <sub>KillExtMtb-M0</sub><br>0.1792 | $\tau_{STAT3-IL10}$<br>0.1877 | prob <sub>STAT1-Ty</sub><br>0.8253 |
| <b>100</b> | Synth <sub>IL10-MI</sub><br>-0.3105 | Synth <sub>IL10-MA</sub><br>-0.2962 | $\delta_{Nf\kappa B}$<br>-0.2392    | kSTAT3IL10<br>-0.1118       | $k_{Nf\kappa B}$<br>0.0902              | $\tau_{STAT3-IL10}$<br>0.2056 | prob <sub>STAT1-Ty</sub><br>0.8231 |
| <b>150</b> | Synth <sub>IL10-MA</sub><br>-0.3152 | Synth <sub>IL10-MI</sub><br>-0.2944 | $\delta_{Nf\kappa B}$<br>-0.2328    | $\delta_{STAT1}$<br>-0.1223 | $k_{Nf\kappa B}$<br>0.1071              | $\tau_{STAT3-IL10}$<br>0.2094 | prob <sub>STAT1-Ty</sub><br>0.8230 |
| <b>200</b> | Synth <sub>IL10-MA</sub><br>-0.2773 | Synth <sub>IL10-MI</sub><br>-0.2589 | $\delta_{Nf\kappa B}$<br>-0.2525    | -0.1241                     | $k_{Nf\kappa B}$<br>0.1089              | $\tau_{STAT3-IL10}$<br>0.1950 | prob <sub>STAT1-Ty</sub><br>0.8178 |

### Total M1

#### PARAMETERS

| Days       | PARAMETERS                         |                                    |                                    |                                    |                                    |                                    |                                    |
|------------|------------------------------------|------------------------------------|------------------------------------|------------------------------------|------------------------------------|------------------------------------|------------------------------------|
| <b>10</b>  | Synth <sub>IL10-MI</sub><br>0.0911 |                                    |                                    |                                    |                                    |                                    |                                    |
| <b>20</b>  | $\tau_{STAT3-IL10}$<br>-0.3921     | $k_{Nf\kappa B}$<br>-0.1328        | $\beta_{Nf\kappa B}$<br>-0.0891    | $\delta_{Nf\kappa B}$<br>0.1416    | Synth <sub>IL10-MA</sub><br>0.1913 | Synth <sub>IL10-MI</sub><br>0.6243 |                                    |
| <b>30</b>  | $\tau_{STAT3-IL10}$<br>-0.4855     | timeRec<br>-0.1462                 | $\delta_{STAT1}$<br>-0.0948        | $k_{STAT3-IL10}$<br>0.0943         | Synth <sub>IL10-MA</sub><br>0.2534 | Synth <sub>IL10-MI</sub><br>0.6908 |                                    |
| <b>40</b>  | $\tau_{STAT3-IL10}$<br>-0.5085     | $\delta_{Nf\kappa B}$<br>-0.1563   | $\delta_{STAT1}$<br>-0.0861        | prob <sub>STAT1-Ty</sub><br>0.0871 | $k_{STAT3-IL10}$<br>0.1072         | Synth <sub>IL10-MA</sub><br>0.2366 | Synth <sub>IL10-MI</sub><br>0.5914 |
| <b>50</b>  | $\tau_{STAT3-IL10}$<br>-0.4670     | $k_{STAT3-IL10}$<br>0.0885         | prob <sub>STAT1-Ty</sub><br>0.1481 | Synth <sub>IL10-MA</sub><br>0.2374 | Synth <sub>IL10-MI</sub><br>0.5450 |                                    |                                    |
| <b>100</b> | $\tau_{STAT3-IL10}$<br>-0.3636     | Synth <sub>IL10-MA</sub><br>0.1665 | prob <sub>STAT1-Ty</sub><br>0.2934 | Synth <sub>IL10-MI</sub><br>0.4669 |                                    |                                    |                                    |
| <b>150</b> | $\tau_{STAT3-IL10}$<br>-0.3806     | Synth <sub>IL10-MA</sub><br>0.1764 | prob <sub>STAT1-Ty</sub><br>0.2292 | Synth <sub>IL10-MI</sub><br>0.5406 |                                    |                                    |                                    |
| <b>200</b> | $\tau_{STAT3-IL10}$<br>-0.3560     | $k_{STAT3-IL10}$<br>0.1035         | Synth <sub>IL10-MA</sub><br>0.1732 | prob <sub>STAT1-Ty</sub><br>0.2363 | Synth <sub>IL10-MI</sub><br>0.4918 |                                    |                                    |

### Total M1M2

#### PARAMETERS

| Days      | PARAMETERS                     |                                    |                                          |                                    |                                    |                                    |                                    |
|-----------|--------------------------------|------------------------------------|------------------------------------------|------------------------------------|------------------------------------|------------------------------------|------------------------------------|
| <b>10</b> | NONE                           |                                    |                                          |                                    |                                    |                                    |                                    |
| <b>20</b> | $\tau_{STAT3-IL10}$<br>-0.4781 | Synth <sub>IL10-MA</sub><br>0.1272 | Synth <sub>IL10-MI</sub><br>0.7512       |                                    |                                    |                                    |                                    |
| <b>30</b> | $\tau_{STAT3-IL10}$<br>-0.5708 | $\delta_{STAT1}$<br>-0.1002        | prob <sub>KillExtMtb-M0</sub><br>-0.0903 | Synth <sub>IL10-MA</sub><br>0.1772 | Synth <sub>IL10-MI</sub><br>0.7644 |                                    |                                    |
| <b>40</b> | $\tau_{STAT3-IL10}$<br>-0.5852 | $\delta_{Nf\kappa B}$<br>-0.1704   | prob <sub>STAT1-Ty</sub><br>0.0897       | $k_{Nf\kappa B}$<br>0.1144         | $k_{STAT3-IL10}$<br>0.1172         | Synth <sub>IL10-MA</sub><br>0.1940 | Synth <sub>IL10-MI</sub><br>0.6639 |

|            |                                       |                                           |                                           |                                           |                                           |                                           |
|------------|---------------------------------------|-------------------------------------------|-------------------------------------------|-------------------------------------------|-------------------------------------------|-------------------------------------------|
| <b>50</b>  | $\tau_{\text{STAT3-IL10}}$<br>-0.5477 | $\delta_{\text{NFkB}}$<br>-0.1566         | $k_{\text{NFkB}}$<br>0.0956               | $\text{Synth}_{\text{IL10-MA}}$<br>0.1268 | $\text{prob}_{\text{STAT1-Ty}}$<br>0.2038 | $\text{Synth}_{\text{IL10-MI}}$<br>0.6208 |
| <b>100</b> | $\tau_{\text{STAT3-IL10}}$<br>-0.3808 | $\text{Synth}_{\text{IL10-MA}}$<br>0.1536 | $\text{prob}_{\text{STAT1-Ty}}$<br>0.3276 | $\text{Synth}_{\text{IL10-MI}}$<br>0.4927 |                                           |                                           |
| <b>150</b> | $\tau_{\text{STAT3-IL10}}$<br>-0.3930 | $k_{\text{STAT3-IL10}}$<br>0.0908         | $\text{Synth}_{\text{IL10-MA}}$<br>0.1308 | $\text{prob}_{\text{STAT1-Ty}}$<br>0.2424 | $\text{Synth}_{\text{IL10-MI}}$<br>0.5409 |                                           |
| <b>200</b> | $\tau_{\text{STAT3-IL10}}$<br>-0.3837 | $\text{Synth}_{\text{IL10-MA}}$<br>0.1625 | $\text{prob}_{\text{STAT1-Ty}}$<br>0.2249 | $\text{Synth}_{\text{IL10-MI}}$<br>0.5282 |                                           |                                           |

**Total TNF  
PARAMETERS**

|             |                                            |                                            |                                            |                                     |                                     |                                                |                                      |                                                |                                                |                                           |                             |                                           |  |
|-------------|--------------------------------------------|--------------------------------------------|--------------------------------------------|-------------------------------------|-------------------------------------|------------------------------------------------|--------------------------------------|------------------------------------------------|------------------------------------------------|-------------------------------------------|-----------------------------|-------------------------------------------|--|
| <b>Days</b> |                                            |                                            |                                            |                                     |                                     |                                                |                                      |                                                |                                                |                                           |                             |                                           |  |
| <b>10</b>   | $\delta_{\text{NFkB}}$<br>-0.1738          | $\text{Synth}_{\text{IL10-MI}}$<br>-0.0939 | $k_{\text{NFkB}}$<br>0.1467                |                                     |                                     |                                                |                                      |                                                |                                                |                                           |                             |                                           |  |
| <b>20</b>   | $\delta_{\text{NFkB}}$<br>-0.5845          | $\text{Synth}_{\text{IL10-MI}}$<br>-0.5720 | $\text{Synth}_{\text{IL10-MA}}$<br>-0.1753 | $\tau_{\text{NFkB-TNF}}$<br>-0.1656 | $\delta_{\text{STAT3}}$<br>-0.1122  | $\text{stat3Beta}$<br>0.0918                   | $\delta_{\text{NFkB}}$<br>0.1721     | $\tau_{\text{STAT3-IL10}}$<br>0.1975           | $\beta_{\text{NFkB}}$<br>0.2593                | $k_{\text{NFkB}}$<br>0.4117               |                             |                                           |  |
| <b>30</b>   | $\text{Synth}_{\text{IL10-MI}}$<br>-0.5612 | $\delta_{\text{NFkB}}$<br>-0.4848          | $\text{Synth}_{\text{IL10-MA}}$<br>-0.2268 | $\delta_{\text{STAT3}}$<br>-0.1147  | $\beta_{\text{NFkB}}$<br>0.1403     | $\delta_{\text{NFkB}}$<br>0.1424               | $\tau_{\text{STAT3-IL10}}$<br>0.2463 | $k_{\text{NFkB}}$<br>0.3125                    | $\text{prob}_{\text{STAT1-Ty}}$<br>0.3876      | $\text{timeRec}$<br>0.5299                |                             |                                           |  |
| <b>40</b>   | $\text{Synth}_{\text{IL10-MI}}$<br>-0.4723 | $\delta_{\text{NFkB}}$<br>-0.4519          | $\text{Synth}_{\text{IL10-MA}}$<br>-0.2017 | $\tau_{\text{NFkB-TNF}}$<br>-0.1261 | $\delta_{\text{STAT3}}$<br>-0.0930  | $\text{timeRec}$<br>0.1103                     | $\delta_{\text{NFkB}}$<br>0.1291     | $\text{prob}_{\text{KillExtMtb-M0}}$<br>0.1300 | $\beta_{\text{NFkB}}$<br>0.1348                | $\tau_{\text{STAT3-IL10}}$<br>0.1655      | $k_{\text{NFkB}}$<br>0.2476 | $\text{prob}_{\text{STAT1-Ty}}$<br>0.7225 |  |
| <b>50</b>   | $\text{Synth}_{\text{IL10-MI}}$<br>-0.4444 | $\delta_{\text{NFkB}}$<br>-0.3448          | $\text{Synth}_{\text{IL10-MA}}$<br>-0.1967 | $\delta_{\text{NFkB}}$<br>-0.1049   | $\tau_{\text{NFkB-TNF}}$<br>-0.0868 | $k_{\text{STAT3IL10}}$<br>-0.0867              | $\delta_{\text{NFkB}}$<br>0.1097     | $\beta_{\text{NFkB}}$<br>0.1122                | $\text{prob}_{\text{KillExtMtb-M0}}$<br>0.1664 | $\tau_{\text{STAT3-IL10}}$<br>0.1821      | $k_{\text{NFkB}}$<br>0.1978 | $\text{prob}_{\text{STAT1-Ty}}$<br>0.8173 |  |
| <b>100</b>  | $\text{Synth}_{\text{IL10-MI}}$<br>-0.3171 | $\delta_{\text{NFkB}}$<br>-0.2689          | $\text{Synth}_{\text{IL10-MA}}$<br>-0.2355 | $\tau_{\text{NFkB-TNF}}$<br>-0.1132 | $k_{\text{STAT3IL10}}$<br>-0.0963   | $\text{prob}_{\text{KillExtMtb-M0}}$<br>0.0903 | $\beta_{\text{NFkB}}$<br>0.1196      | $\tau_{\text{STAT3-IL10}}$<br>0.1526           | $k_{\text{NFkB}}$<br>0.1731                    | $\text{prob}_{\text{STAT1-Ty}}$<br>0.8931 |                             |                                           |  |
| <b>150</b>  | $\text{Synth}_{\text{IL10-MI}}$<br>-0.3257 | $\text{Synth}_{\text{IL10-MA}}$<br>-0.2906 | $\delta_{\text{NFkB}}$<br>-0.2427          | $\delta_{\text{STAT3}}$<br>-0.1096  | $\delta_{\text{NFkB}}$<br>-0.0970   | $\beta_{\text{NFkB}}$<br>0.0886                | $k_{\text{NFkB}}$<br>0.1612          | $\tau_{\text{STAT3-IL10}}$<br>0.1669           | $\text{prob}_{\text{STAT1-Ty}}$<br>0.8929      |                                           |                             |                                           |  |
| <b>200</b>  | $\text{Synth}_{\text{IL10-MI}}$<br>-0.2760 | $\text{Synth}_{\text{IL10-MA}}$<br>-0.2473 | $\delta_{\text{NFkB}}$<br>-0.2460          | $\delta_{\text{STAT3}}$<br>-0.1165  | $\delta_{\text{NFkB}}$<br>-0.1029   | $\beta_{\text{NFkB}}$<br>0.1109                | $\tau_{\text{STAT3-IL10}}$<br>0.1400 | $k_{\text{NFkB}}$<br>0.1673                    | $\text{prob}_{\text{STAT1-Ty}}$<br>0.8903      |                                           |                             |                                           |  |

**Total IL10  
PARAMETERS**

|             |                                           |                                       |                                           |                                  |                                           |                                           |                                           |                                           |  |
|-------------|-------------------------------------------|---------------------------------------|-------------------------------------------|----------------------------------|-------------------------------------------|-------------------------------------------|-------------------------------------------|-------------------------------------------|--|
| <b>Days</b> |                                           |                                       |                                           |                                  |                                           |                                           |                                           |                                           |  |
| <b>10</b>   | $\text{Synth}_{\text{IL10-MI}}$<br>0.6776 |                                       |                                           |                                  |                                           |                                           |                                           |                                           |  |
| <b>20</b>   | $k_{\text{NFkB}}$<br>-0.1652              | $\tau_{\text{STAT3-IL10}}$<br>-0.1475 | $\text{Synth}_{\text{IL10-MA}}$<br>0.0941 | $\delta_{\text{NFkB}}$<br>0.2918 | $\text{Synth}_{\text{IL10-MI}}$<br>0.8953 |                                           |                                           |                                           |  |
| <b>30</b>   | $\text{timeRec}$<br>-0.3206               | $\delta_{\text{NFkB}}$<br>-0.2603     | $\tau_{\text{STAT3-IL10}}$<br>-0.1976     | $k_{\text{NFkB}}$<br>0.1068      | $\text{Synth}_{\text{IL10-MA}}$<br>0.2759 | $\text{Synth}_{\text{IL10-MI}}$<br>0.5882 | $\text{prob}_{\text{STAT1-Ty}}$<br>0.5954 |                                           |  |
| <b>40</b>   | $\delta_{\text{NFkB}}$<br>-0.2925         | $\tau_{\text{STAT3-IL10}}$<br>-0.1749 | $\tau_{\text{NFkB-TNF}}$<br>-0.0989       | $k_{\text{NFkB}}$<br>0.1242      | $\text{timeRec}$<br>0.1527                | $\text{Synth}_{\text{IL10-MA}}$<br>0.2934 | $\text{Synth}_{\text{IL10-MI}}$<br>0.4156 | $\text{prob}_{\text{STAT1-Ty}}$<br>0.7594 |  |



|            |                     |                          |                          |                                            |                          |                                            |                          |                                            |
|------------|---------------------|--------------------------|--------------------------|--------------------------------------------|--------------------------|--------------------------------------------|--------------------------|--------------------------------------------|
| <b>50</b>  | $\delta_{NFkB}$     | $\tau_{STAT3-IL10}$      | $\tau_{NFkB-TNF}$        | timeRec                                    | $k_{NFkB}$               | Synth <sub>IL10-MA</sub>                   | Synth <sub>IL10-MI</sub> | prob <sub>STAT1-T<math>\gamma</math></sub> |
|            | -0.2647             | -0.2077                  | -0.1067                  | 0.1002                                     | 0.1398                   | 0.2413                                     | 0.3920                   | 0.7843                                     |
| <b>100</b> | $\tau_{STAT3-IL10}$ | $\delta_{NFkB}$          | timeRec                  | $k_{NFkB}$                                 | $\beta_{NFkB}$           | Synth <sub>IL10-MA</sub>                   | Synth <sub>IL10-MI</sub> | prob <sub>STAT1-T<math>\gamma</math></sub> |
|            | -0.1495             | -0.1262                  | -0.0898                  | 0.0914                                     | 0.1110                   | 0.1384                                     | 0.3096                   | 0.8295                                     |
| <b>150</b> | $\tau_{STAT3-IL10}$ | $\delta_{NFkB}$          | Act_t <sub>STAT3</sub>   | Synth <sub>IL10-MA</sub>                   | Synth <sub>IL10-MI</sub> | prob <sub>STAT1-T<math>\gamma</math></sub> |                          |                                            |
|            | -0.1327             | -0.1064                  | -0.0858                  | 0.1748                                     | 0.3601                   | 0.7849                                     |                          |                                            |
| <b>200</b> | $\tau_{STAT3-IL10}$ | Synth <sub>IL10-MA</sub> | Synth <sub>IL10-MI</sub> | prob <sub>STAT1-T<math>\gamma</math></sub> |                          |                                            |                          |                                            |
|            | -0.1390             | 0.1580                   | 0.3584                   | 0.7607                                     |                          |                                            |                          |                                            |

### Lesion Size

#### PARAMETERS

|             |                          |                          |                          |                          |                                            |                                            |                     |                                            |            |                                            |
|-------------|--------------------------|--------------------------|--------------------------|--------------------------|--------------------------------------------|--------------------------------------------|---------------------|--------------------------------------------|------------|--------------------------------------------|
| <b>Days</b> |                          |                          |                          |                          |                                            |                                            |                     |                                            |            |                                            |
| <b>10</b>   | $k_{NFkB}$               |                          |                          |                          |                                            |                                            |                     |                                            |            |                                            |
|             | 0.1373                   |                          |                          |                          |                                            |                                            |                     |                                            |            |                                            |
| <b>20</b>   | $\delta_{NFkB}$          | Synth <sub>IL10-MI</sub> | $\tau_{NFkB-TNF}$        | Synth <sub>IL10-MA</sub> | $\tau_{STAT3-IL10}$                        | $\beta_{NFkB}$                             | $k_{NFkB}$          |                                            |            |                                            |
|             | -0.5973                  | -0.2830                  | -0.1724                  | -0.1166                  | 0.1327                                     | 0.2047                                     | 0.3255              |                                            |            |                                            |
| <b>30</b>   | $\delta_{NFkB}$          | Synth <sub>IL10-MI</sub> | $\tau_{NFkB-TNF}$        | Synth <sub>IL10-MA</sub> | $\delta_{STAT3}$                           | $\delta_{STAT1}$                           | $\tau_{STAT3-IL10}$ | $\beta_{NFkB}$                             | $k_{NFkB}$ | prob <sub>STAT1-T<math>\gamma</math></sub> |
|             | -0.6571                  | -0.3572                  | -0.1528                  | -0.1213                  | -0.1141                                    | 0.1014                                     | 0.1608              | 0.2098                                     | 0.3469     | 0.4816                                     |
| <b>40</b>   | $\delta_{NFkB}$          | Synth <sub>IL10-MI</sub> | $\tau_{NFkB-TNF}$        | $\delta_{STAT3}$         | prob <sub>KillExtMtb-M0</sub>              | $\beta_{NFkB}$                             | $k_{NFkB}$          | prob <sub>STAT1-T<math>\gamma</math></sub> |            |                                            |
|             | -0.5811                  | -0.2393                  | -0.1676                  | -0.0920                  | 0.1099                                     | 0.1421                                     | 0.3030              | 0.8234                                     |            |                                            |
| <b>50</b>   | $\delta_{NFkB}$          | Synth <sub>IL10-MI</sub> | $\tau_{NFkB-TNF}$        | timeRec                  | $\beta_{NFkB}$                             | prob <sub>KillExtMtb-M0</sub>              | $k_{NFkB}$          | prob <sub>STAT1-T<math>\gamma</math></sub> |            |                                            |
|             | -0.4616                  | -0.2011                  | -0.1484                  | -0.0967                  | 0.1336                                     | 0.1843                                     | 0.2456              | 0.8944                                     |            |                                            |
| <b>100</b>  | Synth <sub>IL10-MI</sub> | $\delta_{STAT1}$         | Synth <sub>IL10-MA</sub> | $\delta_{NFkB}$          | $\beta_{NFkB}$                             | prob <sub>STAT1-T<math>\gamma</math></sub> |                     |                                            |            |                                            |
|             | -0.1721                  | -0.1554                  | -0.1505                  | -0.1416                  | 0.0951                                     | 0.9501                                     |                     |                                            |            |                                            |
| <b>150</b>  | $\delta_{STAT1}$         | Synth <sub>IL10-MA</sub> | Synth <sub>IL10-MI</sub> | $\delta_{NFkB}$          | prob <sub>STAT1-T<math>\gamma</math></sub> |                                            |                     |                                            |            |                                            |
|             | -0.2591                  | -0.1638                  | -0.1316                  | -0.0950                  | 0.9422                                     |                                            |                     |                                            |            |                                            |
| <b>200</b>  | $\delta_{STAT1}$         | Synth <sub>IL10-MI</sub> | Synth <sub>IL10-MA</sub> | $\tau_{STAT3-IL10}$      | prob <sub>STAT1-T<math>\gamma</math></sub> |                                            |                     |                                            |            |                                            |
|             | -0.2746                  | -0.1825                  | -0.1695                  | 0.0926                   | 0.9302                                     |                                            |                     |                                            |            |                                            |

### Caseation/Necrosis

#### PARAMETERS

|             |                                            |         |                 |
|-------------|--------------------------------------------|---------|-----------------|
| <b>Days</b> |                                            |         |                 |
| <b>10</b>   | NONE                                       |         |                 |
| <b>20</b>   | NONE                                       |         |                 |
| <b>30</b>   | NONE                                       |         |                 |
| <b>40</b>   | prob <sub>STAT1-T<math>\gamma</math></sub> | timeRec | $\delta_{NFkB}$ |
|             | -0.1511                                    | -0.1313 | 0.1140          |

|            |                          |                               |                               |                          |                          |                   |                          |                 |
|------------|--------------------------|-------------------------------|-------------------------------|--------------------------|--------------------------|-------------------|--------------------------|-----------------|
| <b>50</b>  | prob <sub>STAT1-Ty</sub> | timeRec                       | prob <sub>KillExtMtb-M0</sub> | k <sub>NFkB</sub>        | Synth <sub>IL10-MA</sub> | $\tau_{NFkB-TNF}$ | $\tau_{STAT3-IL10}$      | $\delta_{NFkB}$ |
|            | -0.4270                  | -0.2712                       | -0.2338                       | -0.1701                  | -0.1658                  | 0.1302            | 0.1329                   | 0.3591          |
| <b>100</b> | $\delta_{NFkB}$          | prob <sub>KillExtMtb-M0</sub> | Synth <sub>IL10-MI</sub>      | $\tau_{STAT3-IL10}$      | k <sub>NFkB</sub>        | timeRec           |                          |                 |
|            | -0.2990                  | -0.1865                       | -0.1572                       | 0.1012                   | 0.1152                   | 0.3466            |                          |                 |
| <b>150</b> | $\delta_{NFkB}$          | Synth <sub>IL10-MI</sub>      | prob <sub>KillIntMtb</sub>    | $\tau_{NFkB-TNF}$        | $\beta_{NFkB}$           | k <sub>NFkB</sub> | prob <sub>STAT1-Ty</sub> |                 |
|            | -0.2955                  | -0.1489                       | -0.1470                       | -0.1117                  | 0.1267                   | 0.1843            | 0.5631                   |                 |
| <b>200</b> | $\delta_{NFkB}$          | prob <sub>KillIntMtb</sub>    | $\tau_{NFkB-TNF}$             | Synth <sub>IL10-MI</sub> | $\beta_{NFkB}$           | k <sub>NFkB</sub> | prob <sub>STAT1-Ty</sub> |                 |
|            | -0.2297                  | -0.1572                       | -0.0944                       | -0.0929                  | 0.1324                   | 0.1694            | 0.5966                   |                 |

## TNF-induced Apoptosis of Macrophages

| Days       | PARAMETERS               |                          |                          |                        |                        |                        |                               |                               |                          |                     |                          |                          |  |
|------------|--------------------------|--------------------------|--------------------------|------------------------|------------------------|------------------------|-------------------------------|-------------------------------|--------------------------|---------------------|--------------------------|--------------------------|--|
| <b>10</b>  | k <sub>NFkB</sub>        |                          |                          |                        |                        |                        |                               |                               |                          |                     |                          |                          |  |
|            | 0.0976                   |                          |                          |                        |                        |                        |                               |                               |                          |                     |                          |                          |  |
| <b>20</b>  | $\delta_{NFkB}$          | Synth <sub>IL10-MI</sub> | Synth <sub>IL10-MA</sub> | $\tau_{NFkB-TNF}$      | $\delta_{STAT3}$       | $\beta_{STAT3}$        | $\delta_{STAT1}$              | $\tau_{STAT3-IL10}$           | $\beta_{NFkB}$           | k <sub>NFkB</sub>   |                          |                          |  |
|            | -0.4613                  | -0.4500                  | -0.1411                  | -0.1288                | -0.0983                | 0.1093                 | 0.1314                        | 0.1373                        | 0.1843                   | 0.3635              |                          |                          |  |
| <b>30</b>  | $\delta_{NFkB}$          | Synth <sub>IL10-MI</sub> | Synth <sub>IL10-MA</sub> | $\tau_{NFkB-TNF}$      | $\delta_{STAT3}$       | $\beta_{STAT3}$        | prob <sub>STAT1-Ty</sub>      | $\delta_{STAT1}$              | $\tau_{STAT3-IL10}$      | timeRec             | $\beta_{NFkB}$           | k <sub>NFkB</sub>        |  |
|            | -0.6030                  | -0.5616                  | -0.2095                  | -0.1495                | -0.1299                | 0.0964                 | 0.1029                        | 0.1733                        | 0.2240                   | 0.2268              | 0.2335                   | 0.4129                   |  |
| <b>40</b>  | $\delta_{NFkB}$          | Synth <sub>IL10-MI</sub> | Synth <sub>IL10-MA</sub> | $\tau_{NFkB-TNF}$      | $\delta_{STAT3}$       | $\delta_{STAT1}$       | $\beta_{NFkB}$                | $\tau_{STAT3-IL10}$           | prob <sub>STAT1-Ty</sub> | timeRec             | k <sub>NFkB</sub>        |                          |  |
|            | -0.5963                  | -0.5838                  | -0.2256                  | -0.1479                | -0.1405                | 0.1678                 | 0.2079                        | 0.2213                        | 0.2370                   | 0.2820              | 0.3872                   |                          |  |
| <b>50</b>  | Synth <sub>IL10-MI</sub> | $\delta_{NFkB}$          | Synth <sub>IL10-MA</sub> | $\delta_{STAT3}$       | $\tau_{NFkB-TNF}$      | k <sub>STAT3IL10</sub> | $\delta_{STAT1}$              | timeRec                       | $\beta_{NFkB}$           | $\tau_{STAT3-IL10}$ | k <sub>NFkB</sub>        | prob <sub>STAT1-Ty</sub> |  |
|            | -0.5665                  | -0.5429                  | -0.2277                  | -0.1516                | -0.1453                | -0.0947                | 0.1718                        | 0.1799                        | 0.1814                   | 0.2228              | 0.3462                   | 0.4826                   |  |
| <b>100</b> | Synth <sub>IL10-MI</sub> | $\delta_{NFkB}$          | Synth <sub>IL10-MA</sub> | k <sub>STAT3IL10</sub> | $\delta_{STAT3}$       | $\tau_{NFkB-TNF}$      | $\delta_{STAT1}$              | prob <sub>KillExtMtb-M0</sub> | $\beta_{NFkB}$           | $\tau_{STAT3-IL10}$ | k <sub>NFkB</sub>        | prob <sub>STAT1-Ty</sub> |  |
|            | -0.4827                  | -0.3608                  | -0.2879                  | -0.1284                | -0.1216                | -0.1188                | 0.1086                        | 0.1176                        | 0.1288                   | 0.2226              | 0.2335                   | 0.8051                   |  |
| <b>150</b> | Synth <sub>IL10-MI</sub> | $\delta_{NFkB}$          | Synth <sub>IL10-MA</sub> | k <sub>STAT3IL10</sub> | $\delta_{STAT3}$       | $\tau_{NFkB-TNF}$      | prob <sub>KillExtMtb-M0</sub> | $\beta_{NFkB}$                | k <sub>NFkB</sub>        | $\tau_{STAT3-IL10}$ | prob <sub>STAT1-Ty</sub> |                          |  |
|            | -0.4452                  | -0.3256                  | -0.3253                  | -0.1226                | -0.1213                | -0.0968                | 0.0905                        | 0.1211                        | 0.2191                   | 0.2385              | 0.8400                   |                          |  |
| <b>200</b> | Synth <sub>IL10-MI</sub> | Synth <sub>IL10-MA</sub> | $\delta_{NFkB}$          | $\delta_{STAT3}$       | k <sub>STAT3IL10</sub> | $\beta_{NFkB}$         | k <sub>NFkB</sub>             | $\tau_{STAT3-IL10}$           | prob <sub>STAT1-Ty</sub> |                     |                          |                          |  |
|            | -0.4191                  | -0.3361                  | -0.3162                  | -0.1414                | -0.1104                | 0.1193                 | 0.2159                        | 0.2310                        | 0.8541                   |                     |                          |                          |  |

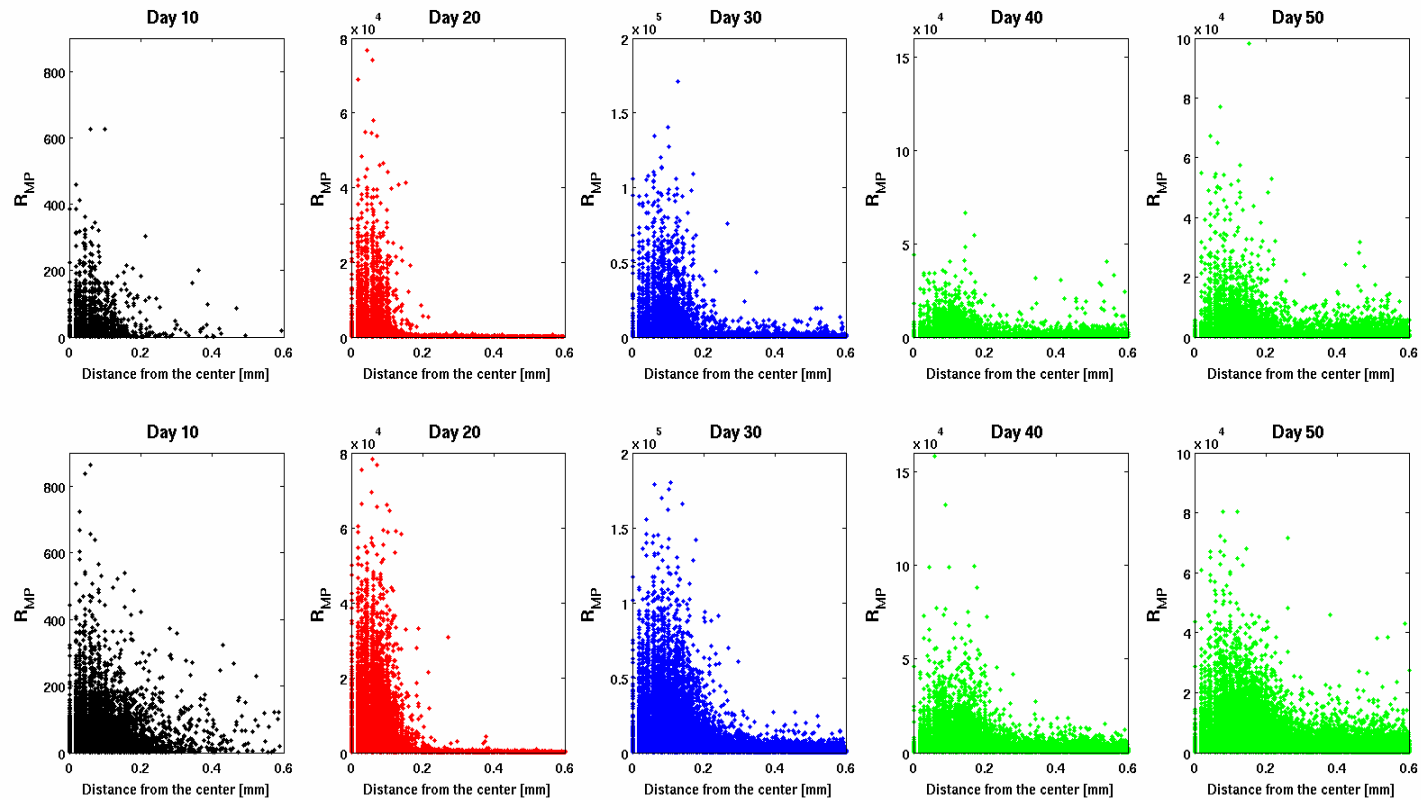

**Figure S1: Spatial distribution of Macrophage Polarization Ratio ( $R_{MP}$ , y-axis in all the panels) from day 10 to 50 post infection within granulomas.** Each dot represents a macrophage polarization ratio. The two rows represent the containment (top row) and dissemination (bottom row) clusters of granulomas, respectively (as shown in Figure 3). The x-axis is the distance each macrophage is from the center of the granuloma (shown here in mm), since we restrict our analysis to granuloma within 1-2 mm in diameter (here 0.6 mm is the radius of the lesion).

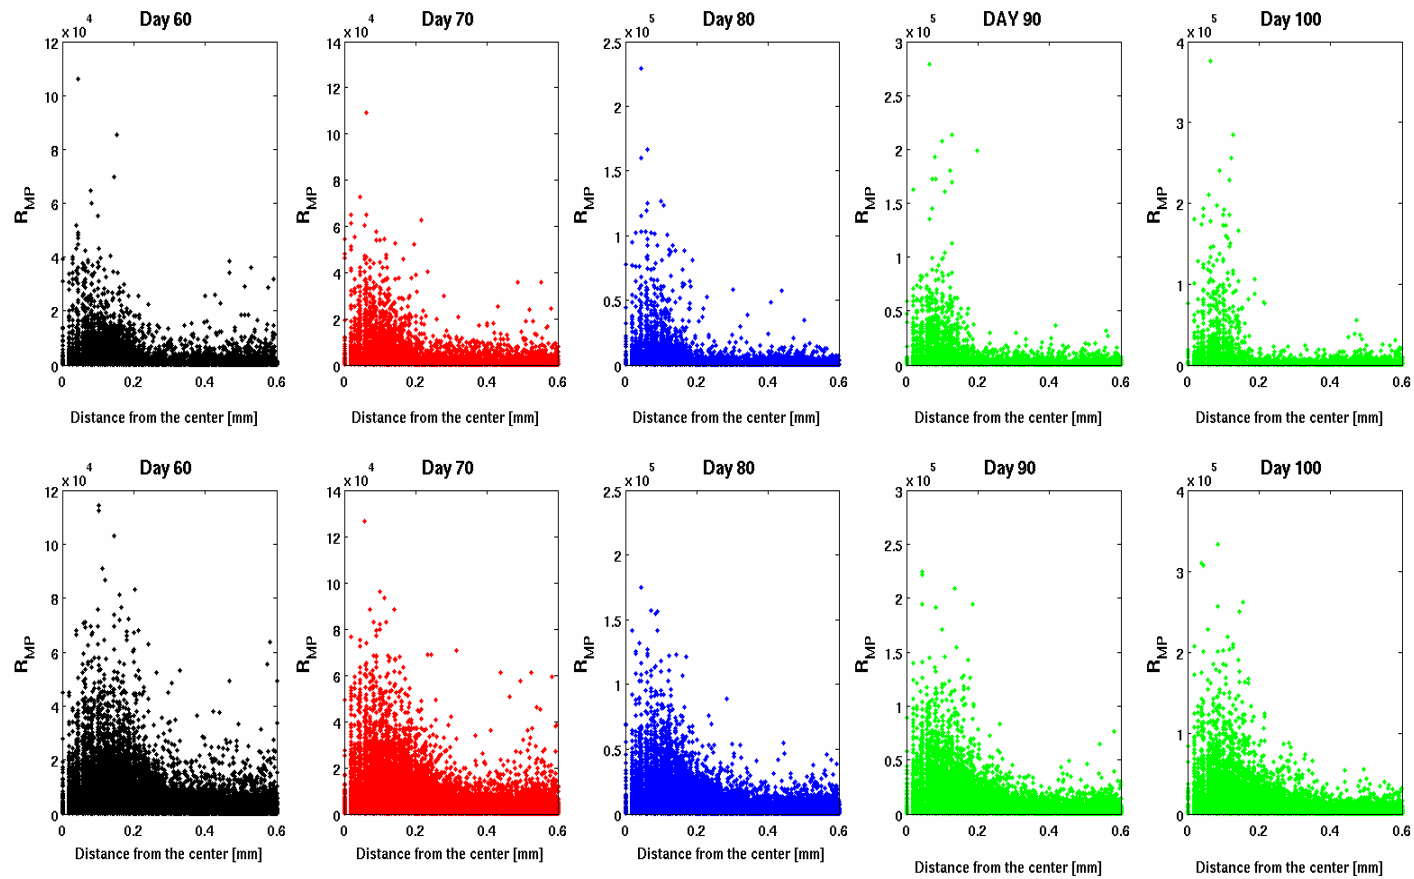

**Figure S2: Spatial distribution of Macrophage Polarization Ratio ( $R_{MP}$ , y-axis in all the panels) from day 60 to 100 post infection within granulomas.** Each dot represents a macrophage polarization ratio. The two rows represent the containment (top row) and dissemination (bottom row) clusters of granulomas, respectively (as shown in Figure 3). The x-axis is the distance each macrophage is from the center of the granuloma (shown here in mm), since we restrict our analysis to granuloma within 1-2 mm in diameter (here 0.6 mm is the radius of the lesion).

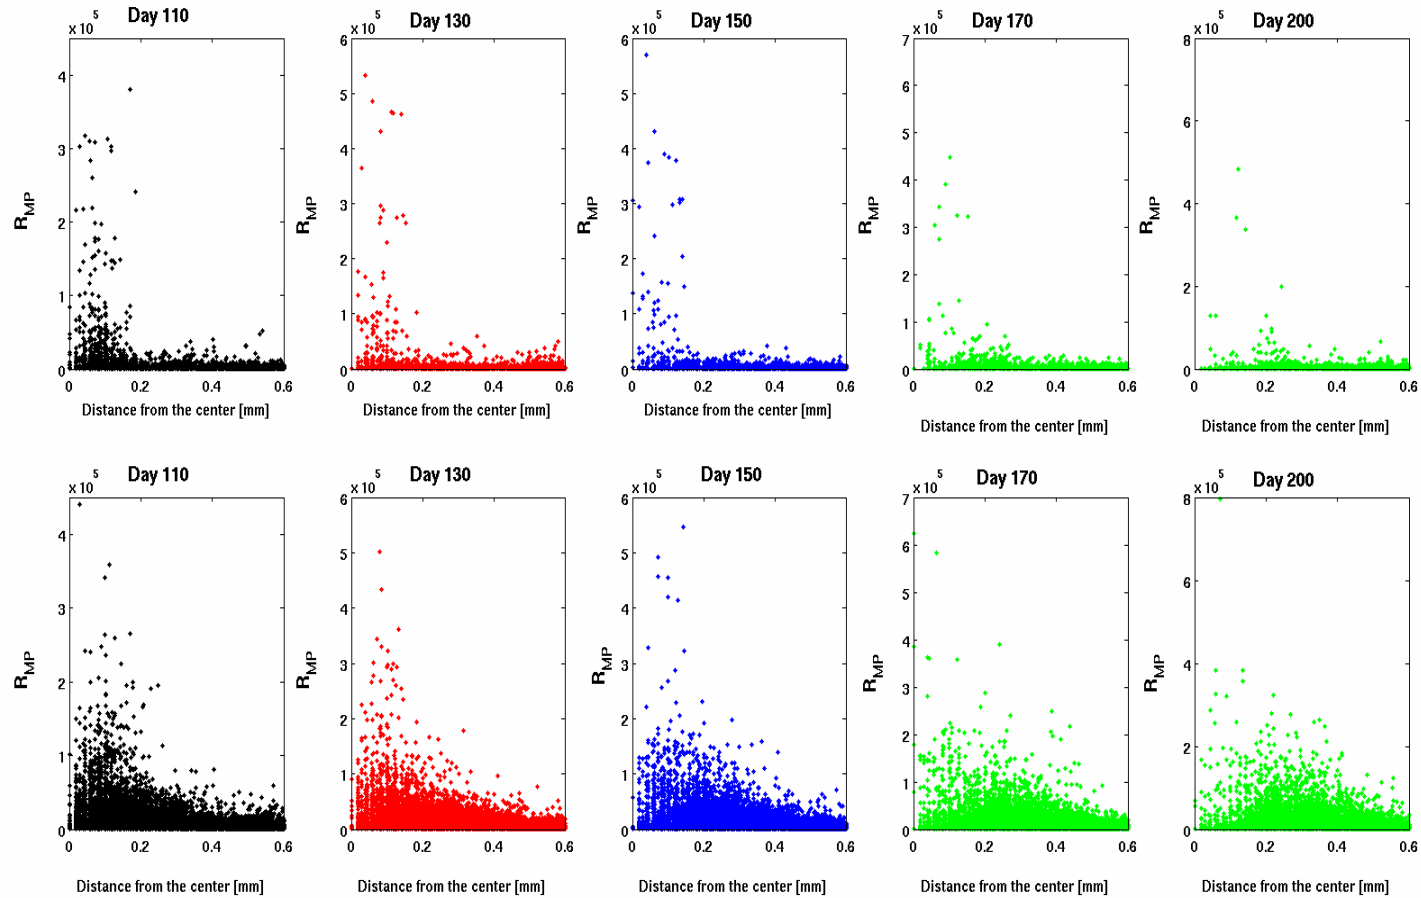

**Figure S3: Spatial distribution of Macrophage Polarization Ratio ( $R_{MP}$ , y-axis in all the panels) from day 100 to 200 post infection within granulomas.** Each dot represents a macrophage polarization ratio. The two rows represent the (top row) containment and dissemination (bottom row) clusters of granulomas, respectively (as shown in Figure 3). The x-axis is the distance each macrophage is from the center of the granuloma (shown here in mm), since we restrict our analysis to granuloma within 1-2 mm in diameter (here 0.6 mm is the radius of the lesion).
